# Supplementary material
Source: PubMed Central journal article supplement (PMC3930991)
Supplement: cn400197x_si_001.pdf [file cn400197x_si_001.pdf]

**Atomic and dynamic insights into the beneficial effect of the NQTrp inhibitor on Alzheimer's A $\beta$ 1-42 Dimer in terms of aggregation and toxicity**

---

Tong Zhang,<sup>1,2</sup> Weixin Xu,<sup>2,3</sup> Yuguang Mu,<sup>2\*</sup> Philippe Derreumaux,<sup>1,4\*</sup>

<sup>1</sup>Laboratoire de Biochimie Théorique, UPR9080 CNRS, Université Paris Diderot, Sorbonne Paris Cité, Institut de Biologie Physico-Chimique, 13 rue Pierre et Marie Curie, 75005 Paris, France

<sup>2</sup>School of Biological Sciences, Nanyang Technological University, 60 Nanyang Drive, Singapore 637551

<sup>3</sup>State Key Laboratory of Precision Spectroscopy, Department of Physics, Institute of Theoretical and Computational Science, East China Normal University, Shanghai 200062, China

<sup>4</sup>Institut Universitaire de France, 103 Boulevard Saint-Michel, 75005 Paris, France

**Table S 1. The binding residues to NQTrp from the 11 to 20 A $\beta$ 1-42 clusters.**

| Clusters | Population (%) | Amino acids at binding pockets.                |                                           | Averaged area of binding interface (Å <sup>2</sup> ) |
|----------|----------------|------------------------------------------------|-------------------------------------------|------------------------------------------------------|
|          |                | Chain A                                        | Chain B                                   |                                                      |
| 11       | 1.93           | E11-V12, Q15-K16, F19, Ser26-N27, I31-I32, M35 | D1-H6, Y10, L17-E22, K28-G33, M35-I41     | 225 ± 6.7                                            |
| 12       | 1.86           | Y10, L17, F20, V24-M35                         | F4-E11, Q15, V24-G29, I31, G33-G37        | 263 ± 6.9                                            |
| 13       | 1.85           | Y10, L17-V18, A21, V24-I32, L34-M35            | F4-H6, S8-V12, Q15, D23-K28, I31, M35-G37 | 260 ± 4.9                                            |
| 14       | 1.79           | D1-Y10, V12, Q15, L17-A21, V24, I31, L34       | F4, K16-V36, G                            | 288 ± 4.4                                            |
| 15       | 1.75           | A2, F4, Y10-H13, Q15, L17-F19, V24, I31, L34   | V12-S25, G29-I41                          | 221 ± 11.8                                           |
| 16       | 1.65           | H6-E22, A30-L34                                | H14, A21-G37, V39                         | 298 ± 3.0                                            |
| 17       | 1.61           | D1, E3-R5, Y10, F19-F20, G29-G37, V39-I41      | H13-A21, D23-G25, K28-I41                 | 247 ± 6.2                                            |
| 18       | 1.59           | D23-V24, S26-L34                               | R5-S8, E11-F20, E22, V24-G25, G29-A42     | 288 ± 4.0                                            |
| 19       | 1.57           | V12-Q15, N27-I41                               | D1, E3-S8, V18-G25, N27-A30, I32, V36-A42 | 178 ± 1.3                                            |
| 20       | 1.44           | Y10, Q15-E22, S26-I32                          | H6-Q15, L17-F20, I31-V40                  | 252 ± 10.4                                           |

Note: The clusters 12 and 13 have similar binding pocket. The clusters 15 and 17 have similar binding pocket. The cluster 11 has similar binding pocket with cluster 3.

**Table S 2. Life-times of exposed side chains to solvent. The residue is defined as exposed when more than 40% of its total side-chain surface area is solvent accessible. Note for Glycine, the lifetime is 0.**

| Residue | lifetime exposed to solvent (%) | Residue | lifetime exposed to solvent (%) |
|---------|---------------------------------|---------|---------------------------------|
| 1       | 94 ± 1                          | 22      | 87 ± 2                          |
| 2       | 63 ± 2                          | 23      | 78 ± 2                          |
| 3       | 77 ± 4                          | 24      | 41 ± 2                          |
| 4       | 57 ± 2                          | 25      | 0                               |
| 5       | 27 ± 4                          | 26      | 25 ± 2                          |
| 6       | 50 ± 3                          | 27      | 48 ± 4                          |
| 7       | 73 ± 3                          | 28      | 63 ± 3                          |
| 8       | 38 ± 2                          | 29      | 0                               |
| 9       | 0                               | 30      | 34 ± 2                          |
| 10      | 41 ± 3                          | 31      | 41 ± 4                          |
| 11      | 76 ± 2                          | 32      | 44 ± 2                          |
| 12      | 40 ± 4                          | 33      | 0                               |
| 13      | 36 ± 4                          | 34      | 39 ± 3                          |
| 14      | 46 ± 4                          | 35      | 42 ± 3                          |
| 15      | 45 ± 2                          | 36      | 42 ± 2                          |
| 16      | 47 ± 3                          | 37      | 0                               |
| 17      | 43 ± 3                          | 38      | 0                               |
| 18      | 41 ± 1                          | 39      | 49 ± 2                          |
| 19      | 50 ± 2                          | 40      | 47 ± 4                          |
| 20      | 57 ± 2                          | 41      | 64 ± 2                          |
| 21      | 35 ± 3                          | 42      | 73 ± 2                          |

**Table S 3. Lifetime of salt bridges. A salt bridge was considered as formed when the distance between the side chain nitrogen atoms of a positively charged residue and the side chain oxygen atoms of negatively charged residues was not more than 3.2 Å.**

| Salt Bridge Lifetime (%) |     | Intra-chain       | Inter-chain       |
|--------------------------|-----|-------------------|-------------------|
| R5                       | D1  | 4.8 ± 2.2         | 2.3 ± 1.3         |
|                          | E3  | 18.6 ± 1.7        | 2.0 ± 0.9         |
|                          | D7  | 31.1 ± 0.2        | 3.7 ± 1.6         |
|                          | E11 | 15.6 ± 2.7        | 3.2 ± 1.2         |
|                          | E22 | 6.1 ± 0.7         | 4.9 ± 1.3         |
|                          | D23 | 0.6 ± 0.1         | 4.1 ± 1.6         |
| <b>R5 Sum</b>            |     | <b>76.7 ± 6.2</b> | <b>20.2 ± 4.7</b> |
| K16                      | D1  | 2.6 ± 1.7         | 1.6 ± 1.0         |
|                          | E3  | 4.8 ± 2.4         | 0.7 ± 0.2         |
|                          | D7  | 5.8 ± 2.3         | 0.4 ± 0.3         |
|                          | E11 | 7.0 ± 1.9         | 2.1 ± 0.6         |
|                          | E22 | 1.2 ± 0.9         | 1.7 ± 0.4         |
|                          | D23 | 0.6 ± 0.6         | 1.1 ± 0.5         |
| <b>K16 Sum</b>           |     | <b>22.1 ± 6.7</b> | <b>7.6 ± 0.8</b>  |
| K28                      | D1  | 1.5 ± 0.8         | 1.3 ± 0.3         |
|                          | E3  | 0.6 ± 0.3         | 0.3 ± 0.1         |
|                          | D7  | 0.4 ± 0.4         | 0.4 ± 0.4         |
|                          | E11 | 1.0 ± 0.6         | 0.5 ± 0.4         |
|                          | E22 | 7.0 ± 2.3         | 0.5 ± 0.5         |
|                          | D23 | 9.4 ± 1.2         | 1.6 ± 0.4         |
| <b>K28 Sum</b>           |     | <b>19.8 ± 2.0</b> | <b>4.6 ± 0.9</b>  |
